# Supplementary material for: ZnO Film Bulk Acoustic Resonator for the Kinetics Study of Human Blood Coagulation
Source: Sensors (Basel). 2017 May 3;17(5):1015. doi: 10.3390/s17051015 (PMC5469538; doi:10.3390/s17051015)
Supplement: Supplementary file 1 [file sensors-17-01015-s001.pdf]

Table S1 The C.V. values of the coagulation parameters for the blood samples activated by different  $\text{Ca}^{2+}$  concentrations.

| <b><math>\text{Ca}^{2+}</math><br/>concentrations<br/>(mM)</b> | <b>Enzymatic<br/>cascade time</b> | <b>Coagulation<br/>rate constant<br/>k</b> | <b>Finial frequency<br/>downshift <math>\Delta f</math></b> | <b>PT</b> |
|----------------------------------------------------------------|-----------------------------------|--------------------------------------------|-------------------------------------------------------------|-----------|
| 5                                                              | 6.7%                              | 4.6%                                       | 7.5%                                                        | 8.5%      |
| 10                                                             | 7.8%                              | 12.3%                                      | 6.6%                                                        | 8.2%      |
| 20                                                             | 6.1%                              | 6.7%                                       | 5.5%                                                        | 5.7%      |
| 40                                                             | 13.3%                             | 9.1%                                       | 7.8%                                                        | 5.7%      |

Table S2 The C.V. values of the coagulation parameters for the blood samples added different concentration heparin.

| <b>Heparin<br/>concentrations<br/>(IU/ml)</b> | <b>Enzymatic<br/>cascade time</b> | <b>Coagulation<br/>rate constant<br/>k</b> | <b>Finial frequency<br/>downshift <math>\Delta f</math></b> | <b>PT</b> |
|-----------------------------------------------|-----------------------------------|--------------------------------------------|-------------------------------------------------------------|-----------|
| 0                                             | 6.7%                              | 4.6%                                       | 7.5%                                                        | 8.5%      |
| 0.2                                           | 6.8%                              | 8.0%                                       | 4.3%                                                        | 5.7%      |
| 0.5                                           | 8.7%                              | 6.7%                                       | 3.4%                                                        | 6.0%      |
| 1                                             | 8.2%                              | 5.0%                                       | 13%                                                         | 9.3%      |
